# Supplementary material
Source: HighWire-hosted journal article supplement (https://fg.bmj.com/content/13/3/225)
Supplement: inline-supplementary-material-2 [file inline-supplementary-material-2.pdf]

|                                  | Number of cohort (%) | Sensitivity % (95% CI) | Specificity % (95% CI) | PPV % (95% CI)      | NPV % (95% CI)      |
|----------------------------------|----------------------|------------------------|------------------------|---------------------|---------------------|
| <b>Investigations</b>            |                      |                        |                        |                     |                     |
| FIT ≥10 µgHb/g                   | 166 (39)             | 90.9<br>(62.3-99.5)    | 33.6<br>(26.6-41.3)    | 8.9<br>(4.9-15.5)   | 98.1<br>(90.1-99.9) |
| FIT >60 µgHb/g                   |                      | 54.6<br>(23.0-78.7)    | 74.2<br>(66.8-80.2)    | 13.0<br>(6.1-25.7)  | 95.8<br>(90.6-98.2) |
| FIT > 100 µgHb/g                 |                      | 54.6<br>(28-78.7)      | 78.7<br>(71.6-84.4)    | 15.4<br>(7.2-29.7)  | 96.1<br>(91.1-98.3) |
| CT scan                          | 158 (37.3)           | 100<br>(78.5-100)      | 84.7<br>(78.0-89.7)    | 38.9<br>(24.8-55.1) | 100<br>(97.0-100)   |
| CIBH                             | 223 (52.7)           | 47.8<br>(29.2-67.0)    | 47.0<br>(42.2-51.9)    | 4.9<br>(2.8-8.6)    | 94.0<br>(89.8-96.5) |
| IDA                              | 125 (29.6)           | 39.1<br>(22.2-59.2)    | 71<br>(66.4-75.2)      | 7.2<br>(3.8-13.2)   | 95.3<br>(92.3-97.2) |
| Rectal bleeding                  | 130 (30.7)           | 47.8<br>(29.2-67)      | 70.3<br>(65.6-74.5)    | 8.5<br>(4.8-14.5)   | 95.9<br>(93-97.6)   |
| Abdominal pain                   | 123 (29.1)           | 34.8<br>(18.8-55.1)    | 71.3<br>(66.6-75.5)    | 6.5<br>(3.3-12.3)   | 95.0<br>(91.9-97.0) |
| Weight loss                      | 82 (19.2)            | 34.8<br>(18.8-55.1)    | 81.5<br>(77.4-85)      | 9.8<br>(5-18.1)     | 95.6<br>(92.9-97.3) |
| <b>Combination of symptoms</b>   |                      |                        |                        |                     |                     |
| Rectal bleeding + IDA            | 16 (3.8)             | 8.7<br>(1.5-26.8)      | 96.5<br>(94.2-97.9)    | 12.5<br>(2.2-36.0)  | 94.8<br>(92.2-96.6) |
| Rectal bleeding + abdominal pain | 41 (9.7)             | 26.1<br>(12.6-46.5)    | 91.3<br>(88.1-93.5)    | 14.6<br>(6.9-28.4)  | 95.6<br>(93 – 97.2) |
| Rectal bleeding + weight loss    | 21 (5.0)             | 17.4<br>(7.0-37.1)     | 95.8<br>(93.3-97.3)    | 19.1<br>(7.7-40.0)  | 95.3<br>(92.7-97.0) |
| Rectal bleeding + CIBH           | 63 (14.9)            | 26.1<br>(12.6-46.5)    | 85.8<br>(82.0-88.9)    | 9.5<br>(4.4-19.3)   | 95.3<br>(92.6-97.0) |
| IDA + abdominal pain             | 9 (2.1)              | 8.7<br>(1.5-26.8)      | 98.3<br>(96.4-99.2)    | 22.2<br>(3.9-54.7)  | 94.9<br>(92.4-96.7) |
| IDA + weight loss                | 12 (2.8)             | 8.7<br>(1.5-26.8)      | 97.8<br>(95.8-98.8)    | 18.2<br>(3.2-47.7)  | 95.0<br>(92.3-96.6) |
| IDA + CIBH                       | 22 (5.2)             | 8.7<br>(1.5-26.8)      | 95.0<br>(92.4-96.7)    | 9.1<br>(1.6-27.8)   | 94.8<br>(92.1-96.6) |

**Supplemental table 2** - Value of investigations and symptoms for patients in diagnosing CRC in those who had a LGI endoscopy (\*a positive CT scan included both features highly suggestive of CRC as well as non specific abnormalities such as bowel wall thickening)
